# Supplementary material for: Relevance of mortalin to cancer cell stemness and cancer therapy
Source: PubMed Central journal article supplement (PMC5292728; doi:10.1038/srep42016), 2017-02-06
Supplement: srep42016-s1.pdf [file srep42016-s1.pdf]

# Relevance of mortalin to cancer cell stemness and cancer therapy

Chae-Ok Yun<sup>1</sup>, Priyanshu Bhargava<sup>2,3</sup>, Youjin Na<sup>1</sup>, Jung-Sun Lee<sup>1</sup>, Jihoon Ryu<sup>2</sup>, Sunil C Kaul<sup>2\*</sup> & Renu Wadhwa<sup>2\*</sup>

<sup>1</sup>Department of Bioengineering, College of Engineering, Hanyang University, 222 Wangsinmi-ro, Seongdong-gu, Seoul, Republic of Korea. <sup>2</sup>DBT-AIST International Laboratory for Advanced Biomedicine (DAILAB), Biomedical Research Institute, National Institute of Advanced Industrial Science & Technology (AIST), Central 5-41, 1-1-1 Higashi, Tsukuba - 305 8565, Japan.

<sup>3</sup>Graduate School of Life & Environmental Sciences, University of Tsukuba, Ibaraki- 305-8575, Japan

**Running title:** Mortalin contributes to cancer cell stemness

## Correspondence and requests for materials should be addressed to:

Renu Wadhwa, National Institute of Advanced Industrial Science & Technology (AIST), Central 5-41, 1-1-1 Higashi, Tsukuba - 305 8565, Japan. Tel: 81-29-861-9464; Fax: 81-29-861-2900. E-mail: [renu-wadhwa@aist.go.jp](mailto:renu-wadhwa@aist.go.jp)

Or

Sunil C. Kaul, National Institute of Advanced Industrial Science & Technology (AIST), Central 5-41, 1-1-1 Higashi, Tsukuba - 305 8565, Japan. Tel: 81-29-861-6713; Fax: 81-29-861-2900. E-mail: [s-kaul@aist.go.jp](mailto:s-kaul@aist.go.jp)

**A**

Relative units of mortalin and CD24 expression as determined by Western blotting with specific antibodies. Endogenous  $\beta$ -actin was used as an internal control.

|                                | Cell Lines Name | Description                    | Mortalin expression (Relative units) | CD24 expression (Relative units) |
|--------------------------------|-----------------|--------------------------------|--------------------------------------|----------------------------------|
| <b>Normal cells</b>            |                 |                                |                                      |                                  |
| 1                              | TIG             | Normal Skin Fibroblast         | 1.0                                  | 1.0                              |
| 2                              | MRC5            | Normal Lung Fibroblast         | 1.0                                  | 1.0                              |
| <b>Immortalized cell lines</b> |                 |                                |                                      |                                  |
| 3                              | JFCF-6B         | SV 40 Immortalized Fibroblast  | 2.2                                  | 2.1                              |
| 4                              | JFCF-4D         | SV 40 Immortalized Fibroblast  | 1.3                                  | 1.6                              |
| <b>Tumorigenic cell lines</b>  |                 |                                |                                      |                                  |
| 5                              | MDA-MB 231      | Breast Adenocarcinoma          | 1.8                                  | 0.3                              |
| 6                              | Saos-2          | Osteogenic Sarcoma             | 4.5                                  | 0.8                              |
| 7                              | HeLa            | Epithelioid Cervical Carcinoma | 4.1                                  | 0.5                              |
| 8                              | HUH-7           | Hepatocellular Carcinoma       | 1.4                                  | 0.6                              |
| 9                              | H1299           | Non-Small Lung Cell Carcinoma  | 2.2                                  | 0.6                              |
| 10                             | MCF-7           | Breast Adenocarcinoma          | 1.8                                  | 1.9                              |
| 11                             | G361            | Skin Malignant Melanoma        | 2.1                                  | 1.4                              |
| 12                             | SKOV3           | Ovarian Carcinoma              | 2.2                                  | 1.5                              |
| 13                             | HUH-6           | Human hepatoblastoma           | 2.0                                  | 1.8                              |
| 14                             | A549            | Adenocarcinoma                 | 3.4                                  | 2.8                              |
| 15                             | DLD-1           | Colorectal Adenocarcinoma      | 1.4                                  | 1.2                              |
| 16                             | COLO320         | Colorectal Adenocarcinoma      | 4.0                                  | 2.1                              |
| 17                             | HCT116          | Colorectal Carcinoma           | 6.7                                  | 2.0                              |

**B**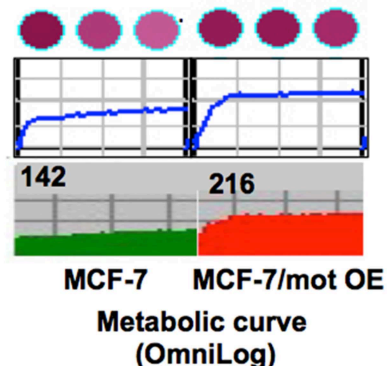

Supplementary Fig. 1

**A**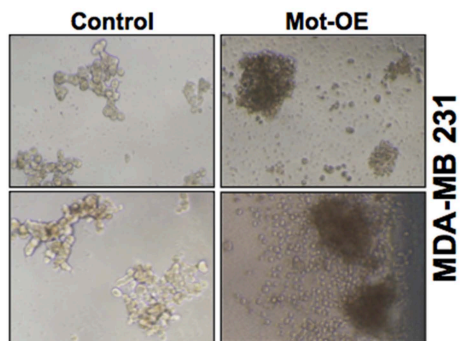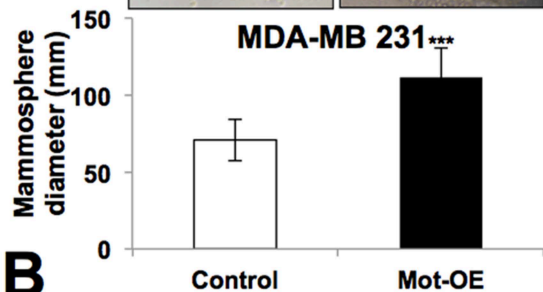**B**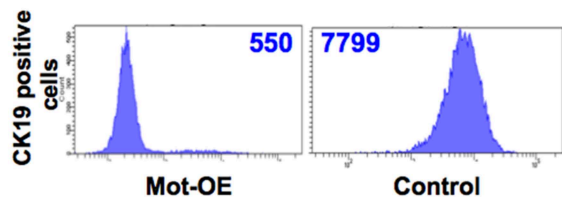**C**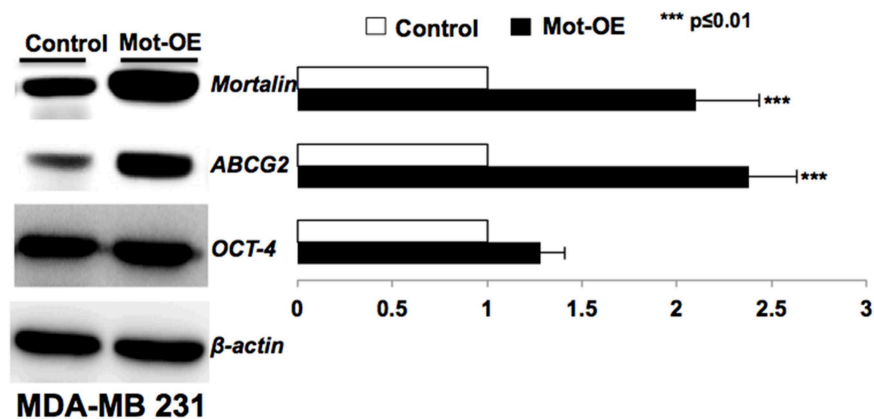**D**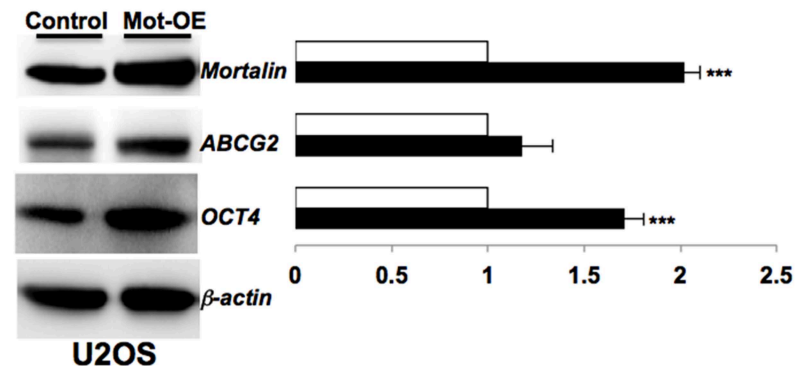

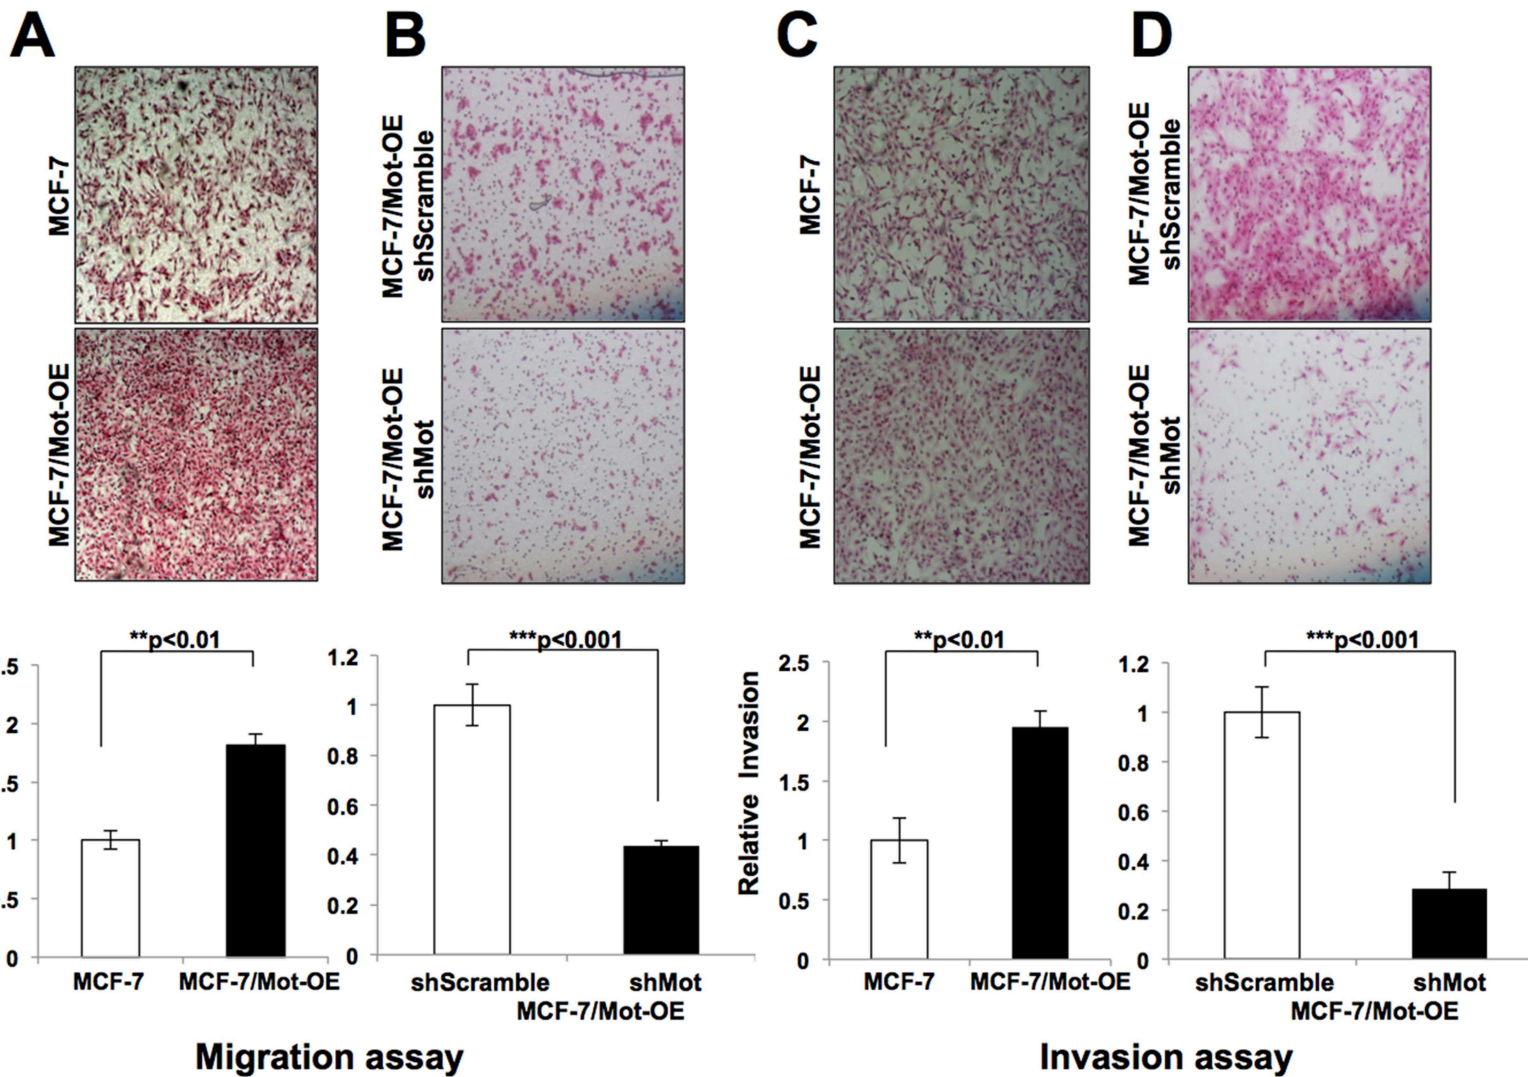

Supplementary Fig. 3

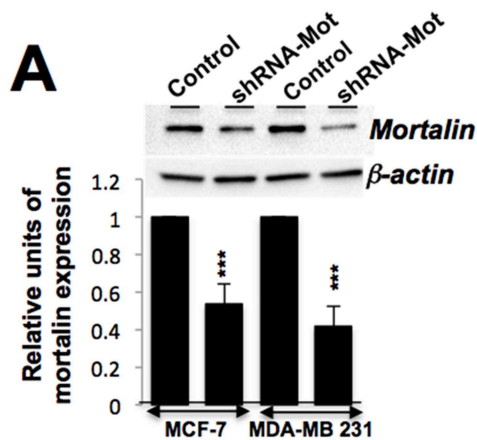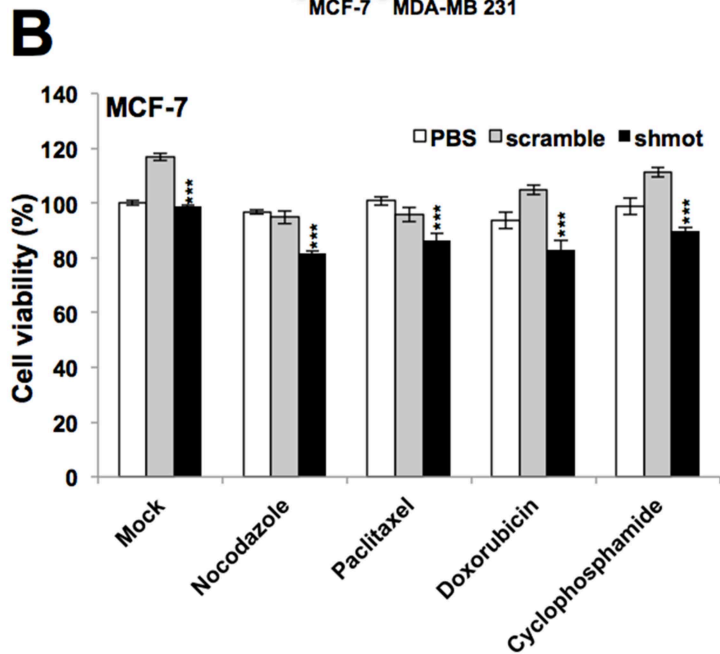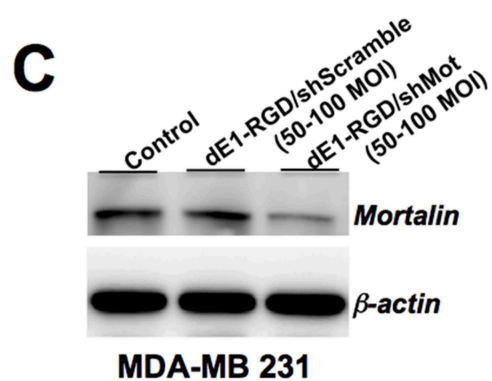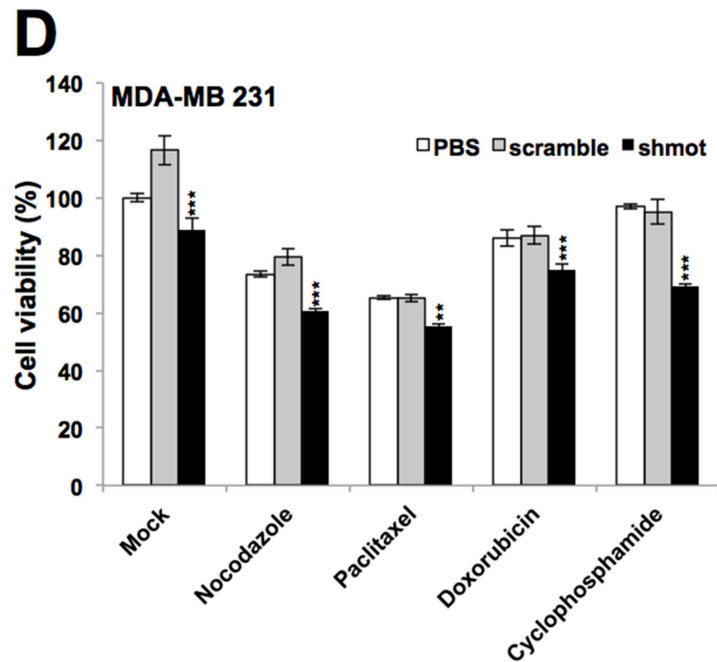

Supplementary Fig. 4

**Supplementary Figure 1. Expression analyses of mortalin and CD24 in human normal and cancer cells.** Quantitation of the protein signals obtained by Western blotting with specific anti-mortalin and anti-CD24 antibodies is shown. The expression was normalized against  $\beta$ -actin as a loading control (**A**). Real time metabolic rate of control and mortalin-overexpressing MCF-7 cells as determined by real time metabolic assay in OmniLog incubator (**B**).

**Supplementary Figure 2. Mortalin-overexpressing MDA-MB 231 cells show cancer stem cell characteristics.** Mortalin-overexpressing MDA-MB 231 cells showed higher degree of spheroid formation expression (**A**), possessed high level of expression of CK19 (**B**), ABCG2, OCT-4 (**C**) as determined by FACS and RT-qPCR analyses, respectively. Mortalin-overexpressing U2OS cells showed high level of expression of ABCG2, OCT-4 as compared to the control cells (**D**).

**Supplementary Figure 3. Mortalin knockdown in cancer cells compromised their migration and invasion capacities.** Mortalin-overexpressing MCF-7 cells showed higher migration and invasion capacities as compared to control (**A** and **C**, respectively). Mortalin knockdown with specific shRNA compromised their migration and invasion capacities (**B** and **D**).

**Supplementary Figure 4. Mortalin knockdown sensitized the cells to drugs.** Mortalin knockdown by shRNA plasmid (**A**) and shRNA-expressing adenovirus (**C**) is shown. Mortalin-targeting shRNA-expressing adenovirus treated mortalin-compromised cells showed better response to a variety of drugs (**B** and **D**).
